# Supplementary material
Source: HighWire-hosted journal article supplement (http://www.jrheum.org/highwire/filestream/34802/field_highwire_adjunct_files/0/180456DataSuppl.pdf)
Supplement: 180456DataSuppl.pdf [file 180456DataSuppl.pdf]

## ONLINE SUPPLEMENTARY DATA

**Supplementary Table 1.** Baseline characteristics of included and excluded subjects

| Characteristic                                  | Subjects included in binary and Cox analyses (n=916) | Subjects included only in Cox regression (n=158) | Subjects excluded (n=423) |
|-------------------------------------------------|------------------------------------------------------|--------------------------------------------------|---------------------------|
| Female sex (n=1458)                             | 593 (66%)                                            | 90 (58%)                                         | 256 (62%)                 |
| Age at diagnosis (years)                        | 8.2 (2.9, 11.9)                                      | 10.8 (5.9, 14.1)                                 | 9.7 (4.0, 12.9)           |
| Time from onset to diagnosis (months)           | 4.3 (2.2, 9.0)                                       | 4.9 (1.9, 11.9)                                  | 3.7 (1.7, 8.4)            |
| Time from diagnosis to enrolment (months)       | 0.05 (0, 1.3)                                        | 0 (0, 1.0)                                       | 5.1 (3.3, 7.7)            |
| JIA category (n=1492)                           |                                                      |                                                  |                           |
| Oligoarthritis                                  | 365 (40%)                                            | 69 (44%)                                         | 163 (39%)                 |
| RF- polyarthritis                               | 194 (21%)                                            | 26 (16%)                                         | 66 (16%)                  |
| Enthesitis-related                              | 118 (13%)                                            | 25 (16%)                                         | 73 (17%)                  |
| Systemic                                        | 58 (6.3%)                                            | 7 (4.4%)                                         | 25 (6.0%)                 |
| Psoriatic                                       | 48 (5.2%)                                            | 17 (11%)                                         | 29 (7.0%)                 |
| RF+ polyarthritis                               | 40 (4.4%)                                            | 2 (1.3%)                                         | 18 (4.3%)                 |
| Undifferentiated                                | 93 (10%)                                             | 12 (7.6%)                                        | 44 (11%)                  |
| Physician global assessment of disease activity | 2.9 (1.4, 5.1)                                       | 2.6 (1, 4.8)                                     | 1.3 (0.3, 3.7)            |
| Active joint count                              | 2 (1, 7)                                             | 2 (1, 4)                                         | 1 (0, 4)                  |

Numbers are median (25<sup>th</sup>, 75<sup>th</sup> centiles) unless otherwise specified. Subjects included in binary and Cox analyses fulfilled three criteria: 1) They were recruited within 90 days of diagnosis, 2) They received no biologic agents or triple DMARD therapy in the six months after diagnosis, 3) Our primary outcome was known (attainment of clinical remission on medication within a year of diagnosis). Most subjects included only in Cox regression missed the 12-month visit. Most excluded subjects were recruited >90 days after diagnosis or only provided data at the enrolment visit.

### **Details of the data cleaning and multiple imputation method:**

Initial data cleaning for impossible values was performed. Continuous responses (time to remission on medication and time to inactive disease) were checked to ensure they were no longer than the total time since diagnosis. For many of the clinical variables there are strict bounds (e.g. on the questionnaire it asks for a value from 0-10); recorded values that were outside these bounds were coded as missing unless we were able to ascertain otherwise from the original patient questionnaire.

This was followed by a series of checks for extreme values. Patients were flagged and reviewed if they had extreme values of Pain, Active Joint Count, Parent Global Assessment, Quality of My Life (QoML), ESR, and CRP. Additionally we were concerned that the QoML question was confusing to patients, as it uses the scale of 0 (poor health) to 10 (excellent health), whereas most other questionnaires use 0 to indicate best and 10 to indicate worst. We checked that for each patient the value of QoML should point in the opposite direction (e.g. higher or lower than average) as the patient's estimate of Pain and Active Joint Count: discordance was flagged and reviewed.

As a result of the data cleaning, flagging, and reviewing, we coded 11 values as missing and 1 value was changed from 20.25 to 2.025.

All missing values were imputed on the 1074 patients. We used multiple imputation, which was performed using the approach of multivariate imputation by chained equations (*mice*) in R [1]. We used the default settings with a couple tweaks: firstly, we did not allow the sub-domains of CHAQ or JAQQ to be used to impute values of other variables, only the total scores were considered. Secondly, the pain intensity value from the CHAQ (How much pain do you think your child has had because of his or her illness in the past week?), was used as the predictor to impute values for the pain intensity value from the JAQQ (Mark an X on the line at a point corresponding to your degree of pain overall in the past week) and vice-versa. Finally, we followed Bodner's [2] recommendation to impute more often when the amount of missing data is higher: since our data had an overall 11% missing rate [11,230 of 98,012 possible entries were missing] we used 20 imputed datasets.

1. van Buuren S, Groothuis-Oudshoorn K. Multivariate Imputation by Chained Equations in R. *J Stat Softw* 2011;45(3):1-67.
2. Bodner TE. What improves with increased data imputations? *Struct Equ Modeling* 2008; 15(4).

**Supplementary Table 2.** Associations with early remission and disposition of all 87 candidate predictors considered in the study

| <i>Variable</i>                    | <i>Odds ratio for early remission on medication</i> | <i>p-value</i> | <i>Entered Models (Binary, Cox)</i> | <i>Availability in routine care</i> | <i>Best binary model *</i> | <i>Best Cox-logistic model</i> | <i>Notes**</i>                                                                              |
|------------------------------------|-----------------------------------------------------|----------------|-------------------------------------|-------------------------------------|----------------------------|--------------------------------|---------------------------------------------------------------------------------------------|
| <b>DEMOGRAPHICS</b>                |                                                     |                |                                     |                                     |                            |                                |                                                                                             |
| Sex                                | 1.25 ( 0.88 - 1.76 )                                | 0.202          | X                                   | Easy                                |                            |                                | Clinically important to enter modeling despite a p>0.2                                      |
| Age at JIA onset                   | 0.97 ( 0.94 - 1.01 )                                | 0.097          | X                                   | Easy                                |                            |                                |                                                                                             |
| Weeks from onset to diagnosis      | 1.00 ( 0.99 - 1.00 )                                | 0.016          | X                                   | Easy                                |                            | X                              |                                                                                             |
| Weeks from diagnosis to enrollment | 1.07 ( 0.89 - 1.29 )                                | 0.453          |                                     |                                     |                            |                                |                                                                                             |
| Parent Education                   | 1.05 ( 0.89 - 1.25 )                                | 0.537          |                                     |                                     |                            |                                |                                                                                             |
| Ethnicity:                         |                                                     |                |                                     |                                     |                            |                                | As some ethnicities were associated with remission, all common ethnicities entered modeling |
| British                            | 0.75 ( 0.53 - 1.04 )                                | 0.078          | X                                   | Hard                                |                            |                                |                                                                                             |
| French                             | 1.37 ( 0.94 - 2.00 )                                | 0.091          | X                                   | Hard                                |                            | X                              |                                                                                             |
| Eastern European                   | 1.19 ( 0.77 - 1.86 )                                | 0.421          | X                                   | Hard                                |                            |                                |                                                                                             |
| Western European                   | 0.89 ( 0.58 - 1.38 )                                | 0.606          | X                                   | Hard                                |                            |                                |                                                                                             |
| Southern European                  | 1.14 ( 0.64 - 2.04 )                                | 0.65           | X                                   | Hard                                |                            |                                |                                                                                             |
| Indian subcontinent                | 1.00 ( 0.56 - 1.78 )                                | 0.994          | X                                   | Hard                                |                            |                                |                                                                                             |
|                                    |                                                     |                |                                     |                                     |                            |                                |                                                                                             |
| <b>JIA CATEGORY</b>                |                                                     | 0.000001       | X                                   | Easy                                |                            | X                              |                                                                                             |
| Oligoarthritis                     | 1.22 (0.97-1.54)                                    |                |                                     |                                     |                            |                                |                                                                                             |
| RF- polyarthritis                  | 0.55 (0.39-0.79)                                    |                |                                     |                                     |                            |                                |                                                                                             |
| Enthesitis related                 | 0.67 (0.43-0.99)                                    |                |                                     |                                     |                            |                                |                                                                                             |
| Systemic                           | 1.04 (0.58-1.88)                                    |                |                                     |                                     |                            |                                |                                                                                             |
| Psoriatic                          | 1.29 (0.68-2.46)                                    |                |                                     |                                     |                            |                                |                                                                                             |
| RF+ polyarthritis                  | 0.24 (0.10-0.59)                                    |                |                                     |                                     |                            |                                |                                                                                             |
| Undifferentiated                   | 0.49 (0.30-0.81)                                    |                |                                     |                                     |                            |                                |                                                                                             |
|                                    |                                                     |                |                                     |                                     |                            |                                |                                                                                             |
| <b>FAMILY HISTORY</b>              |                                                     |                |                                     |                                     |                            |                                |                                                                                             |
| Lupus                              | 1.40 ( 0.64 - 3.05 )                                | 0.391          |                                     |                                     |                            |                                |                                                                                             |
| Psoriatic Arthritis                | 1.54 ( 0.55 - 4.33 )                                | 0.407          |                                     |                                     |                            |                                |                                                                                             |
| Rheumatoid Arthritis               | 0.84 ( 0.55 - 1.29 )                                | 0.412          |                                     |                                     |                            |                                |                                                                                             |
| JRA or JIA                         | 0.86 ( 0.48 - 1.55 )                                | 0.609          |                                     |                                     |                            |                                |                                                                                             |
| Psoriasis                          | 0.93 ( 0.71 - 1.23 )                                | 0.609          |                                     |                                     |                            |                                |                                                                                             |
| IBD with Sacroiliitis              | 0.88 ( 0.47 - 1.67 )                                | 0.693          |                                     |                                     |                            |                                |                                                                                             |

| <i>Variable</i>                                 | <i>Odds ratio for early remission on medication</i> | <i>p-value</i> | <i>Entered Models (Binary, Cox)</i> | <i>Availability in routine care</i> | <i>Best binary model *</i> | <i>Best Cox-logistic model</i> | <i>Notes**</i>                                              |
|-------------------------------------------------|-----------------------------------------------------|----------------|-------------------------------------|-------------------------------------|----------------------------|--------------------------------|-------------------------------------------------------------|
| IBD                                             | 1.06 ( 0.64 - 1.76 )                                | 0.822          |                                     |                                     |                            |                                |                                                             |
| Uveitis                                         | 0.92 ( 0.26 - 3.34 )                                | 0.903          |                                     |                                     |                            |                                |                                                             |
| Ankylosing Spondylitis                          | 0.97 ( 0.41 - 2.33 )                                | 0.953          |                                     |                                     |                            |                                |                                                             |
|                                                 |                                                     |                |                                     |                                     |                            |                                |                                                             |
| <b>PATTERN OF JOINT INVOLVEMENT</b>             |                                                     |                |                                     |                                     |                            |                                |                                                             |
| Symmetric joint involvement                     | 0.48 ( 0.34 - 0.66 )                                | 0.000005       | X                                   | Easy                                |                            | X                              | All pattern of joint involvement variables entered modeling |
| Cervical spine involvement                      | 0.45 ( 0.19 - 1.11 )                                | 0.076          | X                                   | Easy                                |                            |                                |                                                             |
| Temporal mandibular Joint Involvement           | 0.55 ( 0.32 - 0.94 )                                | 0.024          | X                                   | Easy                                |                            |                                |                                                             |
| Upper limb Involvement                          | 0.51 ( 0.37 - 0.71 )                                | 0.000033       | X                                   | Easy                                |                            | X                              |                                                             |
| Wrist involvement                               | 0.59 ( 0.41 - 0.84 )                                | 0.003          | X                                   | Easy                                |                            | X                              |                                                             |
| Finger Joint involvement                        | 0.45 ( 0.32 - 0.64 )                                | 0.000004       | X                                   | Easy                                | X                          |                                |                                                             |
| Sacroiliac Joint Involvement                    | 0.89 ( 0.39 - 2.03 )                                | 0.774          | X                                   | Easy                                |                            |                                |                                                             |
| Lower limb Involvement                          | 0.90 ( 0.61 - 1.34 )                                | 0.602          | X                                   | Easy                                |                            | X                              |                                                             |
| Hip involvement                                 | 0.62 ( 0.37 - 1.05 )                                | 0.068          | X                                   | Easy                                |                            |                                |                                                             |
| Ankle involvement                               | 0.73 ( 0.53 - 1.02 )                                | 0.063          | X                                   | Easy                                |                            |                                |                                                             |
| Subtalar joint involvement                      | 0.56 ( 0.33 - 0.96 )                                | 0.032          | X                                   | Easy                                |                            | X                              |                                                             |
|                                                 |                                                     |                |                                     |                                     |                            |                                |                                                             |
| Presence of enthesitis                          | 0.64 ( 0.37 - 1.09 )                                | 0.094          | X                                   | Easy                                |                            | X                              |                                                             |
| No. enthesitis sites                            | 0.94 ( 0.87 - 1.01 )                                | 0.104          | X                                   | Medium                              |                            | X                              |                                                             |
|                                                 |                                                     |                |                                     |                                     |                            |                                |                                                             |
| <b>PHYSICIAN REPORT</b>                         |                                                     |                |                                     |                                     |                            |                                |                                                             |
| Physician global assessment of disease activity | 0.84 ( 0.79 - 0.91 )                                | 0.000001       | X                                   | Easy                                | X                          | X                              |                                                             |
| Active joint count                              | 0.96 ( 0.94 - 0.98 )                                | 0.000199       | X                                   | Easy                                | X                          |                                |                                                             |
| Stiffness presence according to physician       | 0.76 ( 0.53 - 1.10 )                                | 0.136          | X                                   | Easy                                |                            |                                |                                                             |
| Stiffness duration according to physician       | 0.82 ( 0.55 - 1.22 )                                | 0.311          | X                                   | Easy                                |                            |                                | Entered modeling along with presence of stiffness           |
| Uveitis                                         | 0.70 ( 0.26 - 1.89 )                                | 0.476          |                                     |                                     |                            |                                |                                                             |
| Psoriasis                                       | 0.91 ( 0.42 - 1.99 )                                | 0.817          |                                     |                                     |                            |                                |                                                             |

| <i>Variable</i>                       | <i>Odds ratio for early remission on medication</i> | <i>p-value</i> | <i>Entered Models (Binary, Cox)</i> | <i>Availability in routine care</i> | <i>Best binary model *</i> | <i>Best Cox-logistic model</i> | <i>Notes**</i>                                |
|---------------------------------------|-----------------------------------------------------|----------------|-------------------------------------|-------------------------------------|----------------------------|--------------------------------|-----------------------------------------------|
| JIA Rash                              | 1.04 ( 0.52 - 2.06 )                                | 0.912          |                                     |                                     |                            |                                |                                               |
|                                       |                                                     |                |                                     |                                     |                            |                                |                                               |
| <b>PATIENT/PARENT REPORT</b>          |                                                     |                |                                     |                                     |                            |                                |                                               |
| Total JAQQ score                      | 0.75 ( 0.66 - 0.85 )                                | 0.000005       | X                                   | Hard                                |                            |                                |                                               |
| CHAQ disability index                 | 0.60 ( 0.46 - 0.79 )                                | 0.000139       | X                                   | Medium                              |                            |                                |                                               |
| Pain intensity in last week (CHAQ)    | 0.87 ( 0.82 - 0.93 )                                | 0.000007       | X                                   | Medium                              |                            | X                              |                                               |
| Pain intensity in last week (JAQQ)    | 0.88 ( 0.82 - 0.93 )                                | 0.000041       |                                     |                                     |                            |                                | Included only pain intensity (CHAQ)           |
| Quality of My Life score              | 1.11 ( 1.04 - 1.18 )                                | 0.002          | X                                   | Medium                              |                            |                                |                                               |
| Parent Global Assessment of wellbeing | 0.91 ( 0.85 - 0.97 )                                | 0.002          | X                                   | Medium                              |                            | X                              |                                               |
|                                       |                                                     |                |                                     |                                     |                            |                                |                                               |
| JAQQ gross motor domain               | 0.84 ( 0.77 - 0.92 )                                | 0.000077       |                                     |                                     |                            |                                | Included only the total JAQQ score            |
| JAQQ fine motor domain                | 0.82 ( 0.74 - 0.91 )                                | 0.000235       |                                     |                                     |                            |                                |                                               |
| JAQQ psychological domain             | 0.80 ( 0.71 - 0.90 )                                | 0.000268       |                                     |                                     |                            |                                |                                               |
| JAQQ symptoms domain                  | 0.86 ( 0.77 - 0.96 )                                | 0.005          |                                     |                                     |                            |                                |                                               |
|                                       |                                                     |                |                                     |                                     |                            |                                |                                               |
| CHAQ reaching domain                  | 0.68 ( 0.55 - 0.84 )                                | 0.000307       |                                     |                                     |                            |                                | Included only the total CHAQ disability index |
| CHAQ activities domain                | 0.72 ( 0.60 - 0.87 )                                | 0.000393       |                                     |                                     |                            |                                |                                               |
| CHAQ hygiene domain                   | 0.73 ( 0.59 - 0.91 )                                | 0.004          |                                     |                                     |                            |                                |                                               |
| CHAQ eating domain                    | 0.71 ( 0.55 - 0.91 )                                | 0.005          |                                     |                                     |                            |                                |                                               |
| CHAQ gripping domain                  | 0.77 ( 0.64 - 0.94 )                                | 0.007          |                                     |                                     |                            |                                |                                               |
| CHAQ arising domain                   | 0.76 ( 0.61 - 0.93 )                                | 0.008          |                                     |                                     |                            |                                |                                               |
| CHAQ walking domain                   | 0.79 ( 0.65 - 0.96 )                                | 0.015          |                                     |                                     |                            |                                |                                               |
| CHAQ dressing domain                  | 0.81 ( 0.68 - 0.97 )                                | 0.022          |                                     |                                     |                            |                                |                                               |
| CHAQ item - help with reaching        | 0.42 ( 0.19 - 0.91 )                                | 0.025          |                                     |                                     |                            |                                |                                               |
| CHAQ item - walk                      | 0.65 ( 0.40 - 1.07 )                                | 0.084          |                                     |                                     |                            |                                |                                               |
| CHAQ item - play                      | 0.78 ( 0.63 - 0.95 )                                | 0.014          |                                     |                                     |                            |                                |                                               |
|                                       |                                                     |                |                                     |                                     |                            |                                |                                               |

| Variable                           | Odds ratio for early remission on medication | p-value | Entered Models (Binary, Cox) | Availability in routine care | Best binary model * | Best Cox-logistic model | Notes**                                                |
|------------------------------------|----------------------------------------------|---------|------------------------------|------------------------------|---------------------|-------------------------|--------------------------------------------------------|
| Presence of morning stiffness      | 0.65 ( 0.45 - 0.94 )                         | 0.018   |                              |                              |                     |                         | Physician assessment of stiffness used instead         |
| Duration of Morning Stiffness      | 1.00 ( 1.00 - 1.00 )                         | 0.516   |                              |                              |                     |                         |                                                        |
| Joint swelling reported by parents | 1.25 ( 0.77 - 2.03 )                         | 0.357   | X                            | Hard                         |                     | X                       | Clinically important to enter modeling despite a p>0.2 |
| Lower back pain                    | 0.78 ( 0.43 - 1.42 )                         | 0.405   |                              |                              |                     |                         |                                                        |
| Pain from swollen joints (yes/no)  | 0.82 ( 0.47 - 1.41 )                         | 0.459   |                              |                              |                     |                         |                                                        |
| History of fever (yes/no)          | 1.21 ( 0.74 - 1.98 )                         | 0.444   | X                            | Hard                         |                     |                         | Clinically important to enter modeling despite a p>0.2 |
| Fever pattern                      | 1.15 ( 0.58 - 2.28 )                         | 0.683   |                              |                              |                     |                         |                                                        |
| History of limp                    | 1.10 ( 0.79 - 1.53 )                         | 0.579   |                              |                              |                     |                         |                                                        |
|                                    |                                              |         |                              |                              |                     |                         |                                                        |
| <b>LABORATORY</b>                  |                                              |         |                              |                              |                     |                         |                                                        |
| RF positive at least once          | 0.31 ( 0.14 - 0.68 )                         | 0.003   | X                            | Easy                         |                     | X                       |                                                        |
| Level of C-reactive protein        | 0.99 ( 0.99 - 1.00 )                         | 0.01    | X                            | Easy                         |                     |                         |                                                        |
| Erythrocyte sedimentation rate     | 1.00 ( 0.99 - 1.00 )                         | 0.342   | X                            | Easy                         |                     |                         | Clinically important to enter modeling despite a p>0.2 |
| B27 positive                       | 1.15 ( 0.53 - 2.49 )                         | 0.722   | X                            | Easy                         |                     | X                       |                                                        |
| ANA positive                       | 0.97 ( 0.58 - 1.60 )                         | 0.89    | X                            | Easy                         |                     | X                       |                                                        |
|                                    |                                              |         |                              |                              |                     |                         |                                                        |
| <b>INITIAL TREATMENT</b>           |                                              |         |                              |                              |                     |                         |                                                        |
| DMARD                              | 0.65 ( 0.45 - 0.95 )                         | 0.022   | X                            | Medium                       |                     |                         | All systemic drug use entered modeling                 |
| Systemic corticosteroids           | 0.61 ( 0.37 - 1.01 )                         | 0.048   | X                            | Medium                       |                     |                         |                                                        |
| Joint injection                    | 0.90 ( 0.61 - 1.31 )                         | 0.559   |                              |                              |                     |                         |                                                        |
| NSAID                              | 1.11 ( 0.57 - 2.17 )                         | 0.756   | X                            | Medium                       |                     |                         |                                                        |

\* Our best binary model was a random forest. Random forest models use all the variables provided, they do not drop variables because of a p value cut-off. To understand which variables in the Random Forest are most important for the model's performance, we used the permutation importance methodology of Altmann et al [1] and the p-value calculations of Phipson and Smyth [2]. This is implemented in the R package *prf* [3]. For our purposes, variables with a p-value < 0.05 were marked as retained.

\*\* The decision to enter a variable in modeling was taken by consensus of the investigators based on statistical and clinical considerations. All variables with univariable association strength of  $p < 0.2$  were entered, unless they correlated closely with other variable and had conceptual overlap (e.g. only one measure of pain entered modeling and only total scores, no subdomains, of CHAQ and JAQQ entered modeling). Several variables with a  $p > 0.2$  entered modeling because they had strong

support from previous research as important predictors of JIA prognosis and most clinicians would like to ensure they were considered in modeling. For every such variable, the notes section has a brief comment on the reason. JAQQ and CHAQ domains and isolated CHAQ items were initially considered in case one of them was significantly more predictive of remission than the total questionnaire scores; since this was not the case and they were highly correlated to the total scores, only the total scores entered modeling. The pain scale and the parent global assessment from the CHAQ do not form part of the CHAQ Disability Index; they were considered separate predictors.

1. Altmann A, Tolosi L, Sander O, Lengauer T. Permutation importance: a corrected feature importance measure. *Bioinformatics* 2010;26:1340-7
2. Phipson B, Smyth GK. Permutation P-values should never be zero: calculating exact P-values when permutations are randomly drawn. *Stat Appl Genet Mol Biol* 2010;9:39.
3. Ankur Chakravarthy (2016). pRF: Permutation Significance for Random Forests. R package version 1.2. <https://CRAN.R-project.org/package=pRF>

### Supplementary Tables S3, S4, S5: Results of subgroup sensitivity analyses

Since JIA is a heterogeneous disease, we assessed whether a model fit to a more homogeneous set of patients could do a better job of predicting remission in those patients. In essence, we repeated the Cox-Logistic modeling using three specific clinical groups as the new population:

- 1) A cohort consisting only of patients with Oligoarthritis or RF- polyarthritis
- 2) A cohort presenting with fewer or equal to 4 active joints, excluding sacroiliitis and systemic JIA
- 3) A cohort presenting with 5 or more active joints, excluding sacroiliitis and systemic JIA

The analysis was re-run with each of these 3 cohorts as the entire population for modelling with JIA Category removed as a potential predictor of remission. Each analysis involves 10 runs of all 20 imputed datasets. As before, we hold out about 25% of the data for testing only (see below). We compute the C-Index along with its 95% CI, and provide tables of the adjusted hazard ratios from the Cox-Logistic Models. Our conclusion is that fitting a model specifically for these patients does not result on improved prediction of remission for those patients, relative to our primary model. As such, we are content to use a single model to predict remission for all patients.

| Cohort | Number of subjects | Subjects with known early remission status | Subjects held out in the test set | C-Index on test data (95% CI) |
|--------|--------------------|--------------------------------------------|-----------------------------------|-------------------------------|
| 1)     | 654                | 559                                        | 140                               | 0.657 (0.622 - 0.691)         |
| 2)     | 598                | 499                                        | 125                               | 0.645 (0.612 - 0.678)         |
| 3)     | 368                | 325                                        | 81                                | 0.679 (0.633 - 0.726)         |

**Supplementary Table 3 (Sensitivity analysis 1):** Baseline variables retained in the best Cox-logistic model using only data from patients with oligoarthritis and polyarthritis RF-negative (C-index= 0.66, CI 0.62-0.69)

| Variable                                        | Adjusted hazard ration for time to remission on medications (95%CI) | P-value | Adjusted hazard ration for time to inactive disease (95%CI) | P-value |
|-------------------------------------------------|---------------------------------------------------------------------|---------|-------------------------------------------------------------|---------|
| Pain intensity in last week                     | 0.888 (0.819-0.964)                                                 | 0.004   | 0.891 (0.832-0.954)                                         | 0.001   |
| Physician global assessment of disease activity | 0.909 (0.847-0.974)                                                 | 0.006   | --                                                          |         |
| Upper limb involvement                          | --                                                                  |         | 0.495 (0.286-0.858)                                         | 0.011   |
| Lower limb involvement                          | --                                                                  |         | 0.561 (0.399-0.790)                                         | 0.001   |
| CRP level in mg/L                               | --                                                                  |         | 0.993 (0.986-0.999)                                         | 0.026   |
| ANA positive                                    | 0.784 (0.613-1.004)                                                 | 0.049   | --                                                          |         |
| Quality of my life score                        | 1.062 (0.999-1.128)                                                 | 0.047   | --                                                          |         |
| Joint swelling reported by parents              | --                                                                  |         | 1.434 (1.046-1.966)                                         | 0.022   |



**Supplementary Table 4 (Sensitivity analysis 2):** Baseline variables retained in the best Cox-logistic model using only data from patients with <5 joints affected at enrolment, after excluding patients with sacroiliitis and systemic JIA (C-index= 0.64, CI 0.61-0.68)

| Variable                                        | Adjusted hazard ration for time to remission on medications (95%CI) | P-value | Adjusted hazard ration for time to inactive disease (95%CI) | P-value |
|-------------------------------------------------|---------------------------------------------------------------------|---------|-------------------------------------------------------------|---------|
| Pain intensity in last week                     | 0.871 (0.803-0.943)                                                 | 0.001   | 0.915 (0.859-0.975)                                         | 0.005   |
| Physician global assessment of disease activity | 0.901 (0.844-0.962)                                                 | 0.001   | 0.924 (0.917-0.994)                                         | 0.003   |
| Weeks from onset to diagnosis                   | 0.997 (0.994-0.999)                                                 | 0.002   | 0.997 (0.995-0.998)                                         | <0.001  |
| Upper limb involvement                          | --                                                                  |         | 0.663 (0.459-0.958)                                         | 0.025   |
| Lower limb involvement                          | --                                                                  |         | 0.674 (0.509-0.893)                                         | 0.005   |
| No. enthesitis sites                            | 0.918 (0.0843-1.0)                                                  | 0.045   | --                                                          |         |
| Parent global assessment of wellbeing           | --                                                                  |         | 1.091 (1.033-1.152)                                         | 0.001   |
| CRP level in mg/L                               | --                                                                  |         | 0.993 (0.987-0.999)                                         | 0.024   |
| Any French ethnicity                            | 1.292 (1.022-1.633)                                                 | 0.029   | --                                                          |         |

**Supplementary Table 5 (Sensitivity analysis 3):** Baseline variables retained in the best Cox-logistic model using only data from patients with >4 joints affected at enrolment, after excluding patients with sacroiliitis and systemic JIA (C-index= 0.68, CI 0.63-0.73)

| Variable                                        | Adjusted hazard ration for time to remission on medications (95%CI) | P-value | Adjusted hazard ration for time to inactive disease (95%CI) | P-value |
|-------------------------------------------------|---------------------------------------------------------------------|---------|-------------------------------------------------------------|---------|
| RF positive at least once                       | 0.203 (0.095-0.433)                                                 | <0.001  | 0.438 (0.274-0.700)                                         | <0.001  |
| No. enthesitis sites                            | 0.860 (0.773-0.956)                                                 | 0.004   | 0.912 (0.841-0.989)                                         | 0.022   |
| Physician global assessment of disease activity | 0.907 (0.823-1.000)                                                 | 0.045   | --                                                          |         |
| Weeks from onset to diagnosis                   | 0.996 (0.992-0.999)                                                 | 0.011   | 0.997 (0.995-0.999)                                         | 0.006   |
| Wrist involvement                               | 1.761 (1.091-2.844)                                                 | 0.018   | 1.641 (1.145-2.352)                                         | 0.006   |
| Stiffness duration according to Physician       | 1.756 (1.069-2.883)                                                 | 0.023   | 1.558 (1.087-2.232)                                         | 0.014   |
| Stiffness presence according to Physician       | 2.043 (1.153-3.620)                                                 | 0.012   | --                                                          |         |
| CHAQ disability index                           | 0.605 (0.380-0.963)                                                 | 0.031   | --                                                          |         |
| ANA positive                                    | 0.633 (0.429-0.933)                                                 | 0.018   | --                                                          |         |
| Any French ethnicity                            | 2.013 (1.329-3.050)                                                 | 0.001   | 1.369 (1.006-1.863)                                         | 0.042   |
